# Supplementary material for: Impacts of the 1918 flu on survivors' nutritional status: A double quasi-natural experiment
Source: PubMed Central journal article supplement (PMC7575088; doi:10.1371/journal.pone.0232805), 2020-10-20
Supplement: pone.0232805.s003.pdf [file pone.0232805.s003.pdf]

**S3 Table: CATEGORIES ASSOCIATED WITH THREE DEFINITIONS OF EXPOSURE.**

| EXPOSURE IN UTERO COMBINED WITH BREASTFEEDING |      |                               |         |                                 |         |  |  |
|-----------------------------------------------|------|-------------------------------|---------|---------------------------------|---------|--|--|
| BIRTH DATE                                    |      | GESTATION EXPOSURE            |         | BREASTFEEDING EXPOSURE          |         |  |  |
| Month                                         | Year | Gestational month of exposure | Year    | Breastfeeding month of exposure | Year    |  |  |
| Jul                                           | 1917 | -                             |         | -                               | 1917    |  |  |
| Aug                                           | 1917 | -                             |         | -                               | 1917    |  |  |
| Sep                                           | 1917 | -                             |         | -                               | 1917    |  |  |
| Oct                                           | 1917 | -                             |         | -                               | 1917    |  |  |
| Nov                                           | 1917 | -                             |         | -                               | 1917    |  |  |
| Dec                                           | 1917 | -                             |         | -                               | 1917    |  |  |
| Jan                                           | 1918 | -                             | -       | 6-12                            | 1918    |  |  |
| Feb                                           | 1918 | -                             | -       | 5-12                            | 1918    |  |  |
| Mar                                           | 1918 | -                             | -       | 4-12                            | 1918    |  |  |
| Apr                                           | 1918 | -                             | -       | 3-12                            | 1918    |  |  |
| May                                           | 1918 | -                             | -       | 2-12                            | 1918    |  |  |
| Jun                                           | 1918 | Jun (9)                       | 1918    | 1-12                            | 1918-19 |  |  |
| Jul                                           | 1918 | Jun-Jul (8-9)                 | 1918    | 1-12                            | 1918-19 |  |  |
| Aug                                           | 1918 | Jun-Aug (7-9)                 | 1918    | 1-11                            | 1918-19 |  |  |
| Sep                                           | 1918 | Jun-Sep (6-9)                 | 1918    | 1-10                            | 1918-19 |  |  |
| Oct                                           | 1918 | Jun-Oct (5-9)                 | 1918    | 1-9                             | 1918-19 |  |  |
| Nov                                           | 1918 | Jun-Nov (4-9)                 | 1918    | 1-8                             | 1918-19 |  |  |
| Dec                                           | 1918 | Jun-Dec (3-9)                 | 1918    | 1-7                             | 1918-19 |  |  |
| Jan                                           | 1919 | Jun-Jan (2-9)                 | 1918-19 | 1-6                             | 1919    |  |  |
| Feb                                           | 1919 | Jun-Feb(1-9)                  | 1918-19 | 1-5                             | 1919    |  |  |
| Mar                                           | 1919 | Jul-Mar (1-8)                 | 1918-19 | 1-4                             | 1919    |  |  |
| Apr                                           | 1919 | Aug-Apr (1-9)                 | 1918-19 | 1-3                             | 1919    |  |  |
| May                                           | 1919 | Sep-May (1-9)                 | 1918-19 | 1-2                             | 1919    |  |  |
| Jun                                           | 1919 | Oct-Jun(1-9)                  | 1918-19 | 1                               | 1919    |  |  |
| Jul                                           | 1919 | Nov-Jun(1-8)                  | 1918-19 | -                               | -       |  |  |
| Aug                                           | 1919 | Dec-Jun (1-7)                 | 1918-19 | -                               | -       |  |  |
| Sep                                           | 1919 | Jan-Jun (1-6)                 | 1919    | -                               | -       |  |  |
| Oct                                           | 1919 | Feb-Jun (1-5)                 | 1919    | -                               | -       |  |  |
| Nov                                           | 1919 | Mar-Jun(1-4)                  | 1919    | -                               | -       |  |  |
| Dec                                           | 1919 | Apr-Jun (1-3)                 | 1919    | -                               | -       |  |  |
| Jan                                           | 1920 | May-Jun (1-2)                 | 1919    | -                               | -       |  |  |
| Feb                                           | 1920 | Jun (1)                       | 1919    | -                               | -       |  |  |
